# Supplementary material for: DNA methylation of exercise-responsive genes differs between trained and untrained men
Source: PubMed Central journal article supplement (PMC11225400; doi:10.1186/s12915-024-01938-6), 2024-07-04
Supplement: 12915_2024_1938_MOESM1_ESM.pdf [file 12915_2024_1938_MOESM1_ESM.pdf]

Supplementary Table 1: Targeted DNA methylation panel. Genomic coordinates are based on genome assembly GRCh38/hg38.

| Target region                    | Chromosome | Start     | End       | Length |
|----------------------------------|------------|-----------|-----------|--------|
| <i>ATF2 Promoter</i>             | chr2       | 175181611 | 175182358 | 747    |
| <i>CAMK2A Enhancer</i>           | chr5       | 150256130 | 150256868 | 738    |
| <i>CAMK2A Promoter</i>           | chr5       | 150289630 | 150290353 | 723    |
| <i>CAMKIV Promoter</i>           | chr5       | 111223579 | 111224486 | 907    |
| <i>CREB1 Promoter</i>            | chr2       | 207529048 | 207530297 | 1249   |
| <i>CREB5 Promoter</i>            | chr7       | 28685390  | 28686760  | 1370   |
| <i>CREB5 TSS</i>                 | chr7       | 28412446  | 28412669  | 223    |
| <i>CS Promoter</i>               | chr12      | 56299357  | 56301150  | 1793   |
| <i>ESRRA Promoter</i>            | chr11      | 64305030  | 64306212  | 1182   |
| <i>FOXO1 Enhancer</i>            | chr13      | 40598208  | 40599640  | 1432   |
| <i>FOXO1 Promoter</i>            | chr13      | 40666208  | 40667577  | 1369   |
| <i>FOXO3 Enhancer</i>            | chr6       | 108650156 | 108651861 | 1705   |
| <i>FOXO3 Promoter</i>            | chr6       | 108558752 | 108560683 | 1931   |
| <i>HES1 Promoter</i>             | chr3       | 194135518 | 194136612 | 1094   |
| <i>HIF1A Promoter</i>            | chr14      | 61694712  | 61695621  | 909    |
| <i>HIF1A Promoter/Enhancer</i>   | chr14      | 61697314  | 61698034  | 720    |
| <i>MAPK12 Enhancer</i>           | chr22      | 50248041  | 50249380  | 1339   |
| <i>MAPK12 Promoter</i>           | chr22      | 50261277  | 50262808  | 1531   |
| <i>MEF2A Enhancer</i>            | chr15      | 99718988  | 99719684  | 696    |
| <i>MEF2A Promoter</i>            | chr15      | 99565358  | 99566091  | 733    |
| <i>MSTN Promoter/Enhancer</i>    | chr2       | 190062542 | 190066015 | 3473   |
| <i>MTOR Enhancer</i>             | chr1       | 11157965  | 11158698  | 733    |
| <i>MTOR Promoter</i>             | chr1       | 11261784  | 11262982  | 1198   |
| <i>MYC Enhancer</i>              | chr8       | 127898412 | 127898532 | 120    |
| <i>MYF5 Promoter</i>             | chr12      | 80716415  | 80717349  | 934    |
| <i>MYF6 Promoter</i>             | chr12      | 80706525  | 80707694  | 1169   |
| <i>MYH2 Promoter</i>             | chr17      | 10549558  | 10550157  | 599    |
| <i>MYH6 Promoter</i>             | chr14      | 23409253  | 23409513  | 260    |
| <i>MYH7 Promoter</i>             | chr14      | 23435560  | 23436160  | 600    |
| <i>MYL3 Promoter</i>             | chr3       | 46863344  | 46863943  | 599    |
| <i>MYOD1 Core Enhancer</i>       | chr11      | 17699561  | 17699898  | 337    |
| <i>MYOD1 DRR Enhancer</i>        | chr11      | 17713956  | 17715330  | 1374   |
| <i>MYOD1 Promoter</i>            | chr11      | 17718561  | 17720213  | 1652   |
| <i>MYOG Promoter</i>             | chr1       | 203085593 | 203087076 | 1483   |
| <i>NDUFA4L2_1 Promoter</i>       | chr12      | 57236323  | 57237603  | 1280   |
| <i>NDUFA4L2_2&amp;3 Promoter</i> | chr12      | 57240621  | 57241360  | 739    |
| <i>NRF1 Promoter</i>             | chr7       | 129610993 | 129611946 | 953    |
| <i>PAX7 Promoter</i>             | chr1       | 18630893  | 18631726  | 833    |
| <i>PDK4 Enhancer</i>             | chr7       | 95592725  | 95592845  | 120    |
| <i>PDK4 Promoter</i>             | chr7       | 95596415  | 95597014  | 599    |

|                                      |       |           |           |      |
|--------------------------------------|-------|-----------|-----------|------|
| <i>PPARGC1A alternative Promoter</i> | chr4  | 23903795  | 23904977  | 1182 |
| <i>PPARGC1A Enhancer?</i>            | chr4  | 23880612  | 23883359  | 2747 |
| <i>PPARGC1A Enhancer?</i>            | chr4  | 23934209  | 23935339  | 1130 |
| <i>PPARGC1A Enhancer?</i>            | chr4  | 23945150  | 23946601  | 1451 |
| <i>PPARGC1A proximal Promoter</i>    | chr4  | 23887877  | 23891221  | 3344 |
| <i>PRKAA1 Promoter</i>               | chr5  | 40797940  | 40798913  | 973  |
| <i>PRKAA2 Promoter</i>               | chr1  | 56644815  | 56645414  | 599  |
| <i>SLC2A4 Promoter</i>               | chr17 | 7279539   | 7283489   | 3950 |
| <i>SMAD Enhancer</i>                 | chr15 | 67165245  | 67166183  | 938  |
| <i>SMAD3 Enhancer</i>                | chr15 | 67098033  | 67098808  | 775  |
| <i>SMAD3 Enhancer</i>                | chr15 | 67136625  | 67136886  | 261  |
| <i>SMAD3 Promoter</i>                | chr15 | 67065343  | 67065942  | 599  |
| <i>TBP promoter</i>                  | chr6  | 170553777 | 170554471 | 694  |
| <i>TFAM Promoter</i>                 | chr10 | 58384572  | 58385550  | 978  |
| <i>TGFB1 Promoter</i>                | chr19 | 41353376  | 41354375  | 999  |
| <i>VEGFA Enhancer</i>                | chr6  | 44057596  | 44058015  | 419  |
| <i>VEGFA Promoter</i>                | chr6  | 43769299  | 43772782  | 3483 |

Supplementary Table 2: Proportions of different immune cells estimated by CIBERSORTx (see Methods for details).

| CellType                     | CG         | EG         | SG         | Significant difference |
|------------------------------|------------|------------|------------|------------------------|
| B.cells.memory               | 0,00085012 | 0          | 0,0013107  |                        |
| B.cells.naive                | 0,13336205 | 0,12519107 | 0,11428227 |                        |
| Dendritic.cells.activated    | 0,00637968 | 0,00181708 | 0,00585571 |                        |
| Dendritic.cells.resting      | 0,00122349 | 0,00085793 | 0,00574504 |                        |
| Eosinophils                  | 0,02522647 | 0,01423789 | 0,04422174 |                        |
| Macrophages.M0               | 0,00684289 | 0,00112732 | 0          |                        |
| Macrophages.M1               | 0,06982851 | 0,05455127 | 0,06964833 |                        |
| Macrophages.M2               | 0,46896146 | 0,37532914 | 0,5090656  | * EGvsSG               |
| Mast.cells.activated         | 0,01099842 | 0,00549446 | 0,00299834 |                        |
| Mast.cells.resting           | 0,26890452 | 0,24829314 | 0,27521446 |                        |
| Monocytes                    | 0,06148975 | 0,05800037 | 0,07526069 |                        |
| Neutrophils                  | 0,06795992 | 0,01822721 | 0,03432295 |                        |
| NK.cells.activated           | 0,06457682 | 0,05828663 | 0,0624323  |                        |
| NK.cells.resting             | 0,09553358 | 0,16741426 | 0,11907675 | *EGvsCG                |
| Plasma.cells                 | 0,05870218 | 0,01477505 | 0,01686137 |                        |
| T.cells.CD4.memory.activated | 5,6021E-05 | 0          | 0          |                        |
| T.cells.CD4.memory.resting   | 0,29569428 | 0,30169222 | 0,37713086 |                        |
| T.cells.CD4.naive            | 0,00340222 | 0,01025579 | 0,01476943 |                        |
| T.cells.CD8                  | 0,05837374 | 0,03959892 | 0,01652016 |                        |
| T.cells.follicular.helper    | 0,07121601 | 0,07461673 | 0,10550473 |                        |
| T.cells.gamma.delta          | 0          | 0          | 0          |                        |

|                            |            |           |            |  |
|----------------------------|------------|-----------|------------|--|
| T.cells.regulatory..Tregs. | 0,00217911 | 0,0010491 | 0,00491188 |  |
|----------------------------|------------|-----------|------------|--|

CG = control group, EG = endurance group, SG = strength group

*Supplementary Table 3: Correlations between methylation percentage at baseline and A) Gene expression, B) VO<sub>2</sub>peak, C) Leg Strength and D) Type I Fiber percentage*

| Gene     | A) Gene expression |      | B) VO <sub>2</sub> peak |       | C) Leg Strength |       | D) Type I Fiber % |       |
|----------|--------------------|------|-------------------------|-------|-----------------|-------|-------------------|-------|
|          | R                  | FDR  | R                       | FDR   | R               | FDR   | R                 | FDR   |
| CREB1    | 0.21               | 0.43 | -0.01                   | 0.94  | -0.26           | 0.66  | 0.49              | 0.04  |
| CREB5    | -0.38              | 0.11 | 0.59                    | <0.01 | -0.10           | 0.84  | 0.26              | 0.31  |
| FOXO1    | -0.25              | 0.36 | 0.70                    | <0.01 | 0.07            | 0.89  | 0.46              | 0.06  |
| FOXO3    | -0.30              | 0.22 | 0.71                    | <0.01 | -0.12           | 0.84  | 0.63              | 0.01  |
| HIF1A    | 0.17               | 0.50 | -0.18                   | 0.35  | -0.30           | 0.66  | 0.30              | 0.25  |
| MAPK12   | -0.39              | 0.11 | 0.69                    | <0.01 | 0.04            | 0.89  | 0.31              | 0.24  |
| MEF2A    | -0.14              | 0.59 | 0.23                    | 0.23  | -0.19           | 0.70  | 0.20              | 0.42  |
| MTOR     | -0.09              | 0.70 | 0.43                    | 0.02  | -0.04           | 0.89  | 0.51              | 0.05  |
| MYF5     | -0.23              | 0.39 | 0.32                    | 0.09  | -0.27           | 0.66  | 0.50              | 0.04  |
| MYH2     | -0.39              | 0.11 | 0.54                    | <0.01 | -0.02           | 0.89  | 0.09              | 0.77  |
| MYH7     | -0.18              | 0.50 | -0.45                   | 0.02  | -0.24           | 0.66  | -0.62             | <0.01 |
| MYL3     | -0.52              | 0.04 | -0.51                   | 0.01  | -0.05           | 0.89  | -0.83             | <0.01 |
| MYOD1    | 0.12               | 0.62 | 0.33                    | 0.08  | 0.66            | <0.01 | 0.001             | 0.99  |
| MYOG     | 0.01               | 0.98 | 0.42                    | 0.02  | 0.10            | 0.84  | 0.002             | 0.99  |
| PPARGC1A | -0.43              | 0.11 | 0.64                    | <0.01 | 0.10            | 0.84  | 0.24              | 0.33  |
| SMAD3    | -0.37              | 0.11 | 0.45                    | 0.02  | -0.14           | 0.84  | 0.34              | 0.20  |

*Supplementary Table 4: Primer Sequences*

| Amplicon Name        | Forward Primer         | Reverse Primer         |
|----------------------|------------------------|------------------------|
| Total PGC-1 $\alpha$ | GTGGTGCAGTGACCAATGAG   | CTGCTAGCAAGTTTGCCTCA   |
| PGC-1 $\alpha$ -ex1a | TGTATGGAGTGACATCGAGTGT | GCTGGTCTTCACCAACCAGA   |
| PGC-1 $\alpha$ -ex1b | GACACACATGTTGGGGTTATCA | ACCAACCAGAGCAGCACATTT  |
| B2M                  | AAGGACTGGTCTTTCTATCTC  | GATCCCACTTAACTATCTTGG  |
| TBP                  | TGTGCTCACCCACCAACAAT   | TCTGCTCTGACTTTAGCACCTG |
| PPIA                 | ATGGTTCCCAGTTTTTCATC   | CTCCACAATATTCATGCCTTC  |
